# Supplementary material
Source: Springer Nature journal article supplement (https://www.springermedizin.de/resource/supplementary/12889_2011_3325_MOESM1_ESM.pdf/9488776)
Supplement: MOESM1 [file 9488776]

## **Emotional & Personal Reasons**



- \* **Partner's desire**
- \* **Desire heir/boy child**
- \* **Replacing dead child**
- \* **New partner (women only)**
- \* **Love for partner**
- \* **Wanted HIV-negative child**
- \* **Improved health**

## **Practical & Structural Reasons**



- \* **Lack/ inconsistent FP**
- \* **Believed self/spouse infertile**
- \* **Improved financial situation**
- \* **Alcohol use during sex**
